# Supplementary material for: miR-20a-5p/TGFBR2 Axis Affects Pro-inflammatory Macrophages and Aggravates Liver Fibrosis
Source: Front Oncol. 2020 Feb 13;10:107. doi: 10.3389/fonc.2020.00107 (PMC7031347; doi:10.3389/fonc.2020.00107)
Supplement: Table S2 — List of primers for qTR-PCR. [file Table_2.xlsx]

## Sheet: Sheet1
Table S2. List of primers for qTR-PCR
Primer	sequence (5'to3')
Vimentin-Forward	GCACCACCACCCACGGAATCG
Vimentin-Reverse	CGGAAAGTGGAATCCTTGCA
α-SMA Forward	AAAATGGAGCCAGTCACATGTGG
α-SMA Reverse	CCACCGCAAATGCTTCTAAGT
FSP-1 Forward	GGCAGGAATGATTTGGAAAGG
FSP-1 Reverse	GAAGCTGCATTCCAGAAGGTGA
M-Desmin-Forward	GTGGATGCAGCCACTCTAGC
M-Desmin-Reverse	TTAGCCGCGATGGTCTCATAC
M-TIMP1-Forward	GCAACTCGGACCTGGTCATAA
M-TIMP1-Reverse	CGGCCCGTGATGAGAAACT
CD11B-Forward	CCATGACCTTCCAAGAGAATGC
CD11B-Reverse	ACCGGCTTGTGCTGTAGTC
CD45-Forward	GTTTTCGCTACATGACTGCACA
CD45-Reverse	AGGTTGTCCAACTGACATCTTTC
iNOS-Forward	GTTCTCAGCCCAACAATACAAGA
iNOS-Reverse	GTGGACGGGTCGATGTCAC
IFN-r-Forward	GCCACGGCACAGTCATTGA
IFN-r-Reverse	TGCTGATGGCCTGATTGTCTT
TNF-a-Forward	CAGGCGGTGCCTATGTCTC
TNF-a-Reverse	CGATCACCCCGAAGTTCAGTAG
CCL1-Forward	TGCCGTGTGGATACAGGATG
CCL1-Reverse	GTTGAGGCGCAGCTTTCTCTA
CCL2-Forward	TAAAAACCTGGATCGGAACCAAA
CCL2-Reverse	GCATTAGCTTCAGATTTACGGGT
CCL4-Forward	TTCCTGCTGTTTCTCTTACACCT
CCL4-Reverse	CTGTCTGCCTCTTTTGGTCAG
CCR1-Forward	ACTGCTGTAAGAGCCTTTGGG
CCR1-Reverse	AGCACCAGAATCACTAGGACA
CCR2-Forward	ATCCACGGCATACTATCAACATC
CCR2-Reverse	TCGTAGTCATACGGTGTGGTG
hsa-miR-20a-5p-RT	GTCGTATCCAGTGCGTGTCGTGGAGTCGGCAATTGCACTGGATACGAC CTACCT
hsa-miR-20a-6p-F	GTAAAGTGCTTATAGTGCAG
U6-RT	GTCGTATCCAGTGCGTGTCGTGGAGTCGGCAATTGCACTGGATACGACAAAATATG
U6-F	TTAGCATGGCCCCTGCG
miRNA primer	TGCGTGTCGTGGAGTC
mmu-miR-20a-5p agomir	UAAAGUGCUUAUAGUGCAGGUAG
mmu-miR-20a-5p antagomir	CUACCUGCACUAUAAGCACUUUA
